# Supplementary material
Source: publisher site journal article supplement (https://www.dovepress.com/article/563311)
Supplement: Supplementary file 1 [file 563311%20Supplementary%20Table%20S1%20-%20Re-revised.docx]

Supplementary Table S1. STROBE Checklist

| Section | Item No. | Recommendation | Reported on Page / Section |
| --- | --- | --- | --- |
| Title and Abstract | 1a | Indicate the study’s design with a commonly used term in the title or the abstract | Title; Abstract (Methods) |
|  | 1b | Provide in the abstract an informative and balanced summary of what was done and what was found | Abstract |
| Introduction | 2 | Explain the scientific background and rationale for the investigation being reported | Introduction |
|  | 3 | State specific objectives, including any prespecified hypotheses | Introduction |
| Methods | 4 | Present key elements of study design early in the paper | Methods—Study Design |
|  | 5 | Describe the setting, locations, and relevant dates, including periods of recruitment, exposure, follow-up, and data collection | Methods—Study Population |
|  | 6a | Give the eligibility criteria, and the sources and methods of selection of participants | Methods—Inclusion and Exclusion Criteria |
|  | 6b | For matched studies, give matching criteria and number of exposed and unexposed | Not applicable |
|  | 7 | Clearly define all outcomes, exposures, predictors, potential confounders, and effect modifiers | Methods—Outcomes and Variables |
|  | 8 | Give sources of data and details of methods of assessment (measurement) | Methods—Clinical Assessment and Laboratory Analysis |
|  | 9 | Describe any efforts to address potential sources of bias | Methods—Bias Control |
|  | 10 | Explain how the study size was arrived at | Methods—Sample Size |
|  | 11 | Explain how quantitative variables were handled in the analyses | Methods—Statistical Analysis |
|  | 12a | Describe all statistical methods, including those used to control for confounding | Methods—Statistical Analysis |
|  | 12b | Describe any methods used to examine subgroups and interactions | Methods—Statistical Analysis |
|  | 12c | Explain how missing data were addressed | Methods—Statistical Analysis |
|  | 12d | If applicable, explain how loss to follow-up was addressed | Not applicable |
|  | 12e | Describe any sensitivity analyses | Not applicable |
| Results | 13a | Report numbers of individuals at each stage of study | Results—Patient Characteristics |
|  | 13b | Give reasons for non-participation at each stage | Results |
|  | 13c | Consider use of a flow diagram | Results; Figure 1 |
|  | 14a | Give characteristics of study participants | Results—Baseline Characteristics |
|  | 14b | Indicate number of participants with missing data for each variable | Results |
|  | 14c | Summarize follow-up time | Results |
|  | 15 | Report numbers of outcome events or summary measures over time | Results—Clinical Outcomes |
|  | 16a | Give unadjusted estimates and, if applicable, confounder-adjusted estimates and their precision | Results |
|  | 16b | Report category boundaries when continuous variables were categorized | Results |
|  | 16c | If relevant, consider translating estimates of relative risk into absolute risk | Not applicable |
| Discussion | 17 | Summarize key results with reference to study objectives | Discussion |
|  | 18 | Discuss limitations of the study | Discussion—Limitations |
|  | 19 | Give a cautious overall interpretation of results | Discussion |
|  | 20 | Discuss the generalizability (external validity) of the study results | Discussion |
| Other Information | 21 | Give the source of funding and the role of the funders | Funding Statement |
|  | 22 | Give information on ethics approval and consent | Ethics Statement |
